# Supplementary material
Source: ML conference proceedings conference paper supplement (https://proceedings.mlr.press/v48/inouye16.html)
Supplement: Supplementary file 1 [file inouye16-supp.pdf]

## A. Proof of Exponential SQR Normalization

The basic intuition is clear by looking at the asymptotic growth of each term. However, we specifically outline the possibilities:

1.  $\eta_2 > 0$ :  $A(\eta_1, \eta_2) \rightarrow \infty$ .
2.  $\eta_2 < 0$ :  $A(\eta_1, \eta_2) < \infty$ .
3.  $\eta_2 = 0$ : if  $\eta_1 < 0$ , then  $A(\eta_1, \eta_2) < \infty$ , otherwise  $A(\eta_1, \eta_2) \rightarrow \infty$ .

In summary, we need that  $\eta_2 < 0$  or ( $\eta_2 = 0$  and  $\eta_1 < 0$ ).

**Case 1:**  $\eta_2 > 0$  Let  $\hat{\eta}_2 = \eta_2/2$ . First, we seek an exponential lower bound on the partition function. In particular, we want to find an  $\bar{z}$  such that for all  $z > \bar{z}$ ,  $\exp(\hat{\eta}_2 z) \leq \exp(\eta_1 \sqrt{z} + \eta_2 z)$ . Taking the log of both sides and solving, we find that the critical points of the above inequality are at 0 and  $(-2\frac{\eta_1}{\eta_2})^2$ . We take the non-trivial solution of  $\bar{z} = (-2\frac{\eta_1}{\eta_2})^2$ . Now we need to check if the region to the right of  $\bar{z}$  is possible by plugging into the original equation. Let us try a point  $\tilde{z} = a\bar{z}$  where  $a > 1$ :

$$\exp(\hat{\eta}_2 \tilde{z}) \stackrel{?}{\leq} \exp(\eta_1 \sqrt{\tilde{z}} + \eta_2 \tilde{z}) \quad (16)$$

$$\Rightarrow \hat{\eta}_2 \tilde{z} \stackrel{?}{\leq} \eta_1 \sqrt{\tilde{z}} + \eta_2 \tilde{z} \quad (17)$$

$$\Rightarrow (\eta_2/2 - \eta_2) \tilde{z} \stackrel{?}{\leq} \eta_1 \sqrt{\tilde{z}} \quad (18)$$

$$\Rightarrow -\frac{\eta_2}{2} \left( -2a \frac{\eta_1}{\eta_2} \right)^2 \stackrel{?}{\leq} \eta_1 \sqrt{\left( -2a \frac{\eta_1}{\eta_2} \right)^2} \quad (19)$$

$$\Rightarrow a \frac{-2\eta_1^2}{\eta_2} \stackrel{?}{\leq} \sqrt{a} \frac{-2\eta_1^2}{\eta_2} \quad (20)$$

$$\Rightarrow a \geq \sqrt{a}, \quad (21)$$

where the last line is because we assumed  $a > 1$  and  $\eta_2 > 0$ . Thus, we can lower bound the log partition function as follows:

$$\begin{aligned} A(\eta_1, \eta_2) &= \int_0^{\bar{z}} \exp(\eta_1 \sqrt{z} + \eta_2 z) dz \\ &\quad + \int_{\bar{z}}^{\infty} \exp(\eta_1 \sqrt{z} + \eta_2 z) dz \\ &\geq \int_0^{\bar{z}} \exp(\eta_1 \sqrt{z} + \eta_2 z) dz + \underbrace{\int_{\bar{z}}^{\infty} \exp(\hat{\eta}_2 z) dz}_{\rightarrow \infty, \text{ since } \hat{\eta}_2 > 0} \\ &= \infty. \end{aligned}$$

Therefore, if  $\eta_2 > 0$ , the log partition function diverges and hence the joint distribution is not consistent.

**Case 2:**  $\eta_2 < 0$  Now we will find an exponential upper bound and show that this upper bound converges—and hence the log partition function converges. In a similar manner to case 1, let  $\hat{\eta}_2 = \eta_2/2$ . We want to find an  $\bar{z}$  such that for all  $z > \bar{z}$ ,  $\exp(\hat{\eta}_2 z) \geq \exp(\eta_1 \sqrt{z} + \eta_2 z)$ —the only difference from case 1 is the direction of the inequality. Thus, using the same reasoning as case 1, we have that  $\bar{z} = (-2\frac{\eta_1}{\eta_2})^2$ . Similarly, we need to check if the region to the right of  $\bar{z}$  is possible by plugging into the original equation. In an analogous derivation, we arrive at the same equation as Eqn. 20 except with the inequality is flipped:

$$\Rightarrow a \frac{-2\eta_1^2}{\eta_2} \stackrel{?}{\geq} \sqrt{a} \frac{-2\eta_1^2}{\eta_2} \quad (22)$$

$$\Rightarrow a \geq \sqrt{a}, \quad (23)$$

where the last step is because we assumed  $\eta_2 < 0$  and  $a > 1$ —note that we do not flip the inequality because  $\frac{-2\eta_1^2}{\eta_2}$  is overall a positive number. Thus, this is an upper bound on the interval  $[\bar{z}, \infty]$ :

$$\begin{aligned} A(\eta_1, \eta_2) &= \int_0^{\bar{z}} \exp(\eta_1 \sqrt{z} + \eta_2 z) dz \\ &\quad + \int_{\bar{z}}^{\infty} \exp(\eta_1 \sqrt{z} + \eta_2 z) dz \\ &\leq \int_0^{\bar{z}} \exp(\eta_1 \sqrt{z} + \eta_2 z) dz + \underbrace{\int_{\bar{z}}^{\infty} \exp(\hat{\eta}_2 z) dz}_{\text{Upper bound}} \\ &\leq \underbrace{\int_0^{\bar{z}} \exp(\eta_1 \sqrt{z} + \eta_2 z) dz}_{< \infty} + \underbrace{\int_0^{\infty} \exp(\hat{\eta}_2 z) dz}_{\text{Exp. log partition}} \\ &< \infty, \end{aligned}$$

where the last step is based on the fact that a bounded integral of a finite smooth function is bounded away from  $\infty$  and the second term is merely the log partition function of a standard exponential distribution.

**Case 3:**  $\eta_2 = 0$  This gives the log partition function simply as:

$$A(\eta_1, \eta_2) = \int_0^{\infty} \exp(\eta_1 \sqrt{z}) dz,$$

which has the closed form solution:

$$A(\eta_1, \eta_2) = 2\eta_1^{-2}(\eta_1 \sqrt{z} - 1) \exp(\eta_1 \sqrt{z}) \Big|_0^{\infty} \quad (24)$$

$$= \lim_{z \rightarrow \infty} 2\eta_1^{-2}(\eta_1 \sqrt{z} - 1) \exp(\eta_1 \sqrt{z}) - (-2\eta_1^{-2}) \quad (25)$$

$$= 2\eta_1^{-2} + \lim_{z \rightarrow \infty} 2\eta_1^{-2}(\eta_1 \sqrt{z} - 1) \exp(\eta_1 \sqrt{z}). \quad (26)$$

The convergence critically depends on the limit in Eqn. 26. This limit diverges to  $\infty$  if  $\eta_1 \geq 0$  but converges to 0 if

$\eta_1 < 0$ . Thus, if  $\eta_2 = 0$ , then  $\eta_1 < 0$  for the log partition function to be finite.

## B. Proof of Poisson SQR Normalization (Eqn. 15)

First, we take an upper bound by absorbing the  $\sqrt{z}$  term:

$$A(\eta_1, \eta_2) \leq \sum_{z \in \mathbb{Z}_+} \exp \left( \underbrace{\eta_1 \sqrt{z} + \eta_2 z}_{O(z)} \right) \quad (27)$$

$$- \underbrace{\sum_s \ln(\Gamma(zv_s + 1))}_{O(z \ln z)} \quad (28)$$

$$\leq \sum_{z \in \mathbb{Z}_+} \exp \left( \eta z - \sum_s \ln(\Gamma(zv_s + 1)) \right), \quad (29)$$

where  $\eta = \eta_2 + |\eta_1|$ . We continue the bound as follows:

$$A(\eta_1, \eta_2) \leq \sum_{z \in \mathbb{Z}_+} \exp \left( \eta z - \max_s \ln(\Gamma(zv_s + 1)) \right) \quad (30)$$

$$\leq \sum_{z \in \mathbb{Z}_+} \exp \left( \eta z - \ln(\Gamma(z/p + 1)) \right), \quad (31)$$

where Eqn. 31 comes from the fact that  $\arg \max_{v_s} \ln(\Gamma(zv_s + 1)) \geq 1/p$  (simple proof by contradiction).

Now let us use the ratio test for convergent series where  $a_z = \exp \left( \eta(z/p + 1) - \ln(\Gamma((z/p + 1) + 1)) \right)$ :

$$\lim_{z \rightarrow \infty} \frac{|a_{z+1}|}{|a_z|} = \exp(\eta(z+1) - \ln(\Gamma((z+1)/p + 1))) - [\eta z - \ln(\Gamma(z/p + 1))] \quad (32)$$

$$= \lim_{z \rightarrow \infty} \exp \left( \eta + \ln \left( \frac{\Gamma(z/p + 1)}{\Gamma((z+1)/p + 1)} \right) \right) \quad (33)$$

$$= \exp(\eta) \lim_{z \rightarrow \infty} \frac{\Gamma(z/p + 1)}{\Gamma((z/p + 1) + 1/p)} \frac{(z/p + 1)^{1/p}}{(z/p + 1)^{1/p}} \quad (34)$$

$$= \exp(\eta) \lim_{z \rightarrow \infty} \frac{1}{(z/p + 1)^{1/p}} \times \lim_{z \rightarrow \infty} \frac{\Gamma(z/p + 1)(z/p + 1)^{1/p}}{\Gamma((z/p + 1) + 1/p)} \quad (35)$$

$$= \exp(\eta) \lim_{z \rightarrow \infty} \frac{1}{(z/p + 1)^{1/p}} (1) \quad (36)$$

$$= \exp(\eta)(0)(1) = 0 < 1, \quad (37)$$

where Eqn. 35 is by the product of limits rule and Eqn. 36 is by the well-known asymptotic properties of gamma functions. Therefore, by the ratio test, the radial conditional log partition function is bounded for any  $\eta_1 < \infty$  and  $\eta_2 < \infty$ .
